# Supplementary material
Source: MDPI journal article supplement (https://www.mdpi.com/2073-4344/11/1/55)
Supplement: s1 [file s1]

Supplementary Materials

# Novel Preparation of Cu and Fe Zirconia Supported Catalysts for Selective Catalytic Reduction of NO with NH<sub>3</sub>

Katarzyna Świrk <sup>1,\*†</sup>, Ye Wang <sup>2,3,†</sup>, Changwei Hu <sup>2,4,\*</sup>, Li Li <sup>4</sup>, Patrick Da Costa <sup>3,\*</sup> and Gérard Delahay <sup>1</sup>

<sup>1</sup> Institut Charles Gerhardt Montpellier, Université de Montpellier, ENSCM (MACS), CNRS, 34296 Montpellier, France; gerard.delahay@enscm.fr

<sup>2</sup> College of Chemical Engineering, Sichuan University, Chengdu 610065, China; xihazhezhe@gmail.com

<sup>3</sup> Institut Jean Le Rond d'Alembert, Sorbonne Université, CNRS, 78210 Saint Cyr l'Ecole, France

<sup>4</sup> Key Laboratory of Green Chemistry and Technology, Ministry of Education, College of Chemistry, Sichuan University, Chengdu 610064, China; lili2209362583@163.com

\* Correspondence: katarzyna.swirk@umontpellier.fr (K.Ś.); changwei.hu@scu.edu.cn (C.H.); patrick.da\_costa@sorbonne-universite.fr (P.D.C.); Tel.: +86-28-8541-1105 (C.H.); +33-1-442-79562 (P.D.C.)

† K.Ś. and Y.W. contributed equally.

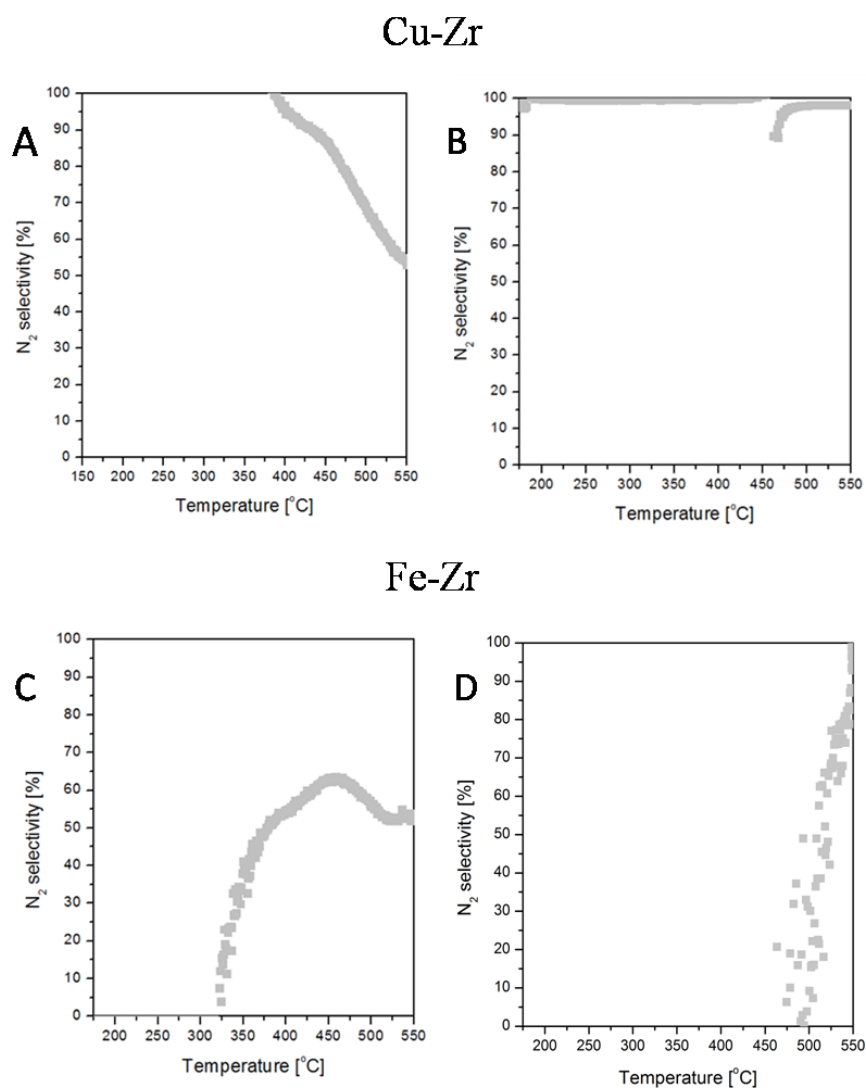

**Figure S1.** N<sub>2</sub> selectivity as a function of temperature measured during NH<sub>3</sub>-SCO over Cu-Zr catalyst (A) in absence of water, (B) in presence of water, Fe-Zr catalyst (C) in absence of water, (D) in presence of water, and ZrO<sub>2</sub> support (E) in absence of water, (F) in presence of water. The experimental conditions: [NH<sub>3</sub>] = 1000 ppm, [H<sub>2</sub>O] = 3.5 vol% when used, [O<sub>2</sub>] = 2.5 vol% diluted in helium; total flowrate of 100 ml/min.
